# Supplementary material
Source: Research Square preprint supplement (doi:10.21203/rs.3.rs-9412640/v1)
Supplement: Supplementary file 1 [file 22d4518c69f1ff2add27b3fa.docx]

**Supporting Information for**

Visual Thresholds Cannot Be Reliably Measured Without Controlling for Mind-Wandering

Annemarie Scholz 1, Christoph Reichert 2, Paul Schmid 3, Tom Weischner 2, Robert T. Knight 4,5, Stefan Dürschmid *****,2,3

1 Otto-von-Guericke University Magdeburg, Department of Psychology, Pfälzer Platz 24, 39106 Magdeburg, Germany

2 Leibniz Institute for Neurobiology, Brenneckestr. 6, 39118 Magdeburg, Germany

3 Clinic for Psychiatry, Otto-von-Guericke University, Leipziger Str. 44, 39120 Magdeburg, Germany

4 Departments of Neuroscience and Psychology, University of California Berkeley, 245 Warren Hall, Berkeley, 94720, CA, USA

5 Helen Wills Neuroscience Institute, University of California Berkeley, Berkeley, 94720, CA, USA

*Corresponding author: Stefan Dürschmid

**Email:**  stefan.duerschmid@lin-magdeburg.de

**This PDF file includes:**

Tables S1 to S6

**Other supporting materials for this manuscript include the following:**

Datasets and Scripts

Tables

**Table S1.** Overview of the mean reaction times – averaged across subjects (standard deviation in parentheses) separately for each paradigm.

|  | ON |  | Unlabeled |  | OFF |
| --- | --- | --- | --- | --- | --- |
| Grating | 441.1 (85.3) |  | 427.0 (95.6) |  | 418.2 (84.7) |
| Curvature | 544.1 (116.0) |  | 554.1 (151.2) |  | 542.1 (121.7) |
| Color | 600.3 (114.7) |  | 571.0 (132.0) |  | 547.4 (102.8) |
| Faces | 521.0 (101.4) |  | 511.8 (96.3) |  | 504.2 (90.8) |

**Table S2.** Summary of the comparisons of reaction times between the different trial types for each paradigm. We applied a Bonferroni correction for multiple comparisons. The corrected p-value threshold for statistical significance was set at p = .0042. The table shows that we did not find differences in reaction times between trial types.

| pcorr = .0042 | ON vs. Unlabeled |  | ON vs. OFF |  | Unlabeled vs. OFF |
| --- | --- | --- | --- | --- | --- |
| Grating | t = .85; p = .3956 |  | t = 1.48; p = .1425 |  | t = .53; p = .5941 |
| Curvature | t = .39; p = .6907 |  | t = .09; p = .9283 |  | t = .47; p = .6393 |
| Color | t = 1.29; p = .1967 |  | t = 2.65; p = .0089 |  | t = 1.09; p = .2779 |
| Faces | t = .52; p = .6059 |  | t = .97; p = .3355 |  | t = .45; p = .6552 |

**Table S3.** Overview of the perceptual thresholds separately for each paradigm. Here we show the average threshold across subjects (standard deviation in parentheses).

|  | ON |  | Unlabeled |  | OFF |
| --- | --- | --- | --- | --- | --- |
| Grating | .44 (.10) |  | .51 (.09) |  | .55 (.18) |
| Curvature | .42 (.18) |  | .55 (.14) |  | .53 (.18) |
| Color | .44 (.12) |  | .54 (.13) |  | .52 (.17) |
| Faces | .46 (.15) |  | .53 (.13) |  | .50 (.16) |

Table S4. Comparisons of thresholds between the different trial types for each experiment. We applied a Bonferroni correction for multiple comparisons. The corrected p-value threshold for statistical significance was set at p = .0042. Asterisks (*) indicate comparisons that remain significant after correction. The table shows that ON and Unlabeled trials show significant differences. However, the comparison between Unlabeled and OFF trials never reaches statistical significance, while the according BF10 values also indicate substantial evidence in favor of the null hypothesis.

| pcorr = .0042 | ON vs. Unlabeled |  | ON vs. OFF |  | Unlabeled vs. OFF |
| --- | --- | --- | --- | --- | --- |
| Grating | *t = 3.66; p = .0004*;*  BF10 = 18608.57 |  | *t = 3.79; p = .0002*;*  BF10 = 436.59 |  | t = 1.38; p = .1715;  BF10 = 1.20 |
| Curvature | *t = 4.18; p = .0001*;*  BF10 = 1523.97 |  | *t = 3.16; p = .0020*;*  BF10 = 25.42 |  | t = 0.69; p = .5486;  BF10 = 0.21 |
| Color | *t = 4.17; p = .0001*;*  BF10 = 401.9 |  | t = 2.66; p = .0090;  BF10 = 4.61 |  | t = 0.93; p = .3535;  BF10 = 0.27 |
| Faces | t = 1.48; p = .0143;  BF10 = 78.95 |  | t = 1.29; p = .1982;  BF10 = 0.5 |  | t = 1.06; p = .2890;  BF10 = 0.46 |

Table S5. Overview of the accuracy in trials with supra-threshold stimulus intensity separately for each paradigm. Here we show the average accuracy across subjects (standard deviation in parentheses).

|  | ON |  | Unlabeled |  | OFF |
| --- | --- | --- | --- | --- | --- |
| Grating | .95 (.04 ) |  | .92 (.05) |  | .89 (.07) |
| Curvature | .91 (.06) |  | .87 (.06) |  | .87 (.08) |
| Color | .95 (.07) |  | .92 (.09) |  | .91 (.08) |
| Faces | .92 (.06) |  | .91 (.06) |  | .90 (.05) |

Table S6. Summary of the comparisons of suprathreshold accuracy between the different trial types for each paradigm. We applied a Bonferroni correction for multiple comparisons. The corrected p-value threshold for statistical significance was set at p = .0042. Asterisks (*) indicate comparisons that remain significant after correction. The table shows that ON and Unlabeled trials show significant differences. However, the comparison between Unlabeled and OFF trials only reaches statistical significance for Grating stimuli. For Curvature and Face stimuli, BF10 values for the same comparisons provide substantial evidence in favor of the null hypothesis.

| pcorr = .0042 | ON vs. Unlabeled |  | ON vs. OFF |  | Unlabeled vs. OFF |
| --- | --- | --- | --- | --- | --- |
| Grating | *t = 3.24; p = .0015*;*  BF10 = 679779636.32 |  | *t = 6.45; p < .0001*;*  BF10 = 11862040694.54 |  | *t = 3.76; p = .0003*;*  BF10 = 540840.87 |
| Curvature | *t = 3.77; p = .0005*;*  BF10 = 26353.51 |  | *t = 3.21; p = .0017*;*  BF10 = 82.05 |  | t = 0.12 p = .9044;  BF10 = 0.15 |
| Color | t = 1.49; p = .1393;  BF10 = 9.38 |  | t = 2.88; p = .0053;  BF10 = 1991.02 |  | t = 1.14; p = .2544;  BF10 = 7.18 |
| Faces | t = 1.62; p = .1068;  BF10 = 84.49 |  | t = 2.40; p = .0179;  BF10 = 8.86 |  | t = 0.58; p = .5651;  BF10 = 0.19 |
